# Supplementary material
Source: ML conference proceedings conference paper supplement (https://openreview.net/forum?id=F7XPZnIUHh)
Supplement: supplementary_material [file attachment]

## Supplementary for Theorem 3.1

### proof for Theorem 3.1

*Proof.* Overall speaking, the derivation of the variance bound is built upon the classic theory in Bickel et. al. (1993) (Section 3). Denote  $f(y(0), y(1), |\mathbf{x})$  as the conditional probability density of the potential outcomes  $(Y(0), Y(1))$  given  $\mathbf{x}$ ,  $e(\mathbf{x}) := p(T = 1|\mathbf{x})$ , and  $f(\mathbf{x})$  as the density of  $\mathbf{x}$ . Then the joint density of  $(Y(0), Y(1), T, \mathbf{X})$  is

$$p(y(0), y(1), t, \mathbf{x}) = f(y(0), y(1), |\mathbf{x})e(\mathbf{x}).$$

Let  $f_1(\cdot|\mathbf{x}) := \int f(y(0), \cdot)d_{y(0)}$  and  $f_0(\cdot|\mathbf{x}) := \int f(\cdot, y(1))d_{y(1)}$ , then joint density of  $(Y, T, \mathbf{X})$  is

$$p(y, t, \mathbf{x}) = [f_1(y|\mathbf{x})e(\mathbf{x})]^t [f_0(y|\mathbf{x})(1 - e(\mathbf{x}))]^{1-t} f(\mathbf{x}).$$

Consider a parametric model  $p(y, t, \mathbf{x}|\theta) = [f_1(y|\mathbf{x}, \theta)e(\mathbf{x}, \theta)]^t [f_0(y|\mathbf{x}, \theta)(1 - e(\mathbf{x}, \theta))]^{1-t} f(\mathbf{x}, \theta)$  such that  $p(y, t, \mathbf{x}|\theta_0) = p(y, t, \mathbf{x})$ . The corresponding score  $s(t, y, \mathbf{x}|\theta) = \frac{\partial}{\partial \theta} \log p(y, t, \mathbf{x}|\theta)$  is

$$\begin{aligned} s(t, y, \mathbf{x} | \theta) &\equiv t \cdot \left[ \frac{\partial}{\partial \theta} \log f_1(y|\mathbf{x}, \theta) \right] + (1 - t) \cdot \left[ \frac{\partial}{\partial \theta} \log f_0(y|\mathbf{x}, \theta) \right] \\ &\quad + \frac{t - p(\mathbf{x}, \theta)}{e(\mathbf{x}, \theta)(1 - e(\mathbf{x}, \theta))} \cdot \left[ \frac{\partial}{\partial \theta} e(\mathbf{x}, \theta) \right] + \frac{\partial}{\partial \theta} \log f(\mathbf{x}, \theta). \end{aligned}$$

Then the tangent space of the model  $p(y, t, \mathbf{x}|\theta)$  is

$$\mathcal{P} := \left\{ t \cdot \left[ \frac{\partial}{\partial \theta} \log f_1(y|\mathbf{x}) \right] + (1 - t) \cdot \left[ \frac{\partial}{\partial \theta} \log f_0(y|\mathbf{x}) \right] + a(\mathbf{x})(t - e(\mathbf{x})) + \frac{\partial}{\partial \theta} \log f(\mathbf{x}) \right\},$$

where  $a(\mathbf{x})$  is any square-integrable measurable function of  $\mathbf{x}$ . Now we turn back to the formulation of  $\tau(\mathbf{x})$ ,

$$\tau_\theta(\mathbf{x}) = \int y f_1(y|\mathbf{x}, \theta) dy - \int y f_0(y|\mathbf{x}, \theta) dy.$$

Let  $F_\tau(Y, T, \mathbf{X}) = \frac{T}{e(\mathbf{X})}(Y - \mu_1(\mathbf{X})) - \frac{1-T}{1-e(\mathbf{X})}(Y - \mu_0(\mathbf{X}))$ , where  $\mu_t(\mathbf{X}) := \mathbb{E}[Y(t)|\mathbf{X}]$ . Then we may validate that

$$\frac{\partial}{\partial \theta} \tau(\theta_0) = \mathbb{E}[F_\tau(Y, T, \mathbf{X}) s(T, Y, \mathbf{X}|\theta_0)].$$

Then based on the result in Bickel et. al. (1993), the variance bound of  $\tau(\mathbf{x})$  is the expected squares of the projection  $F_\tau(Y, T, \mathbf{X})$  in the tangent space  $\mathcal{P}$ , which is equal to  $\mathbb{E}[\frac{\sigma_1^2(\mathbf{X})}{e(\mathbf{X})} + \frac{\sigma_0^2(\mathbf{X})}{1-e(\mathbf{X})}]$ .  $\square$

*Proof.* Overall speaking, the derivation of the variance bound is built upon the classic theory in Bickel et. al. (1993) (Section 3). Denote  $f(y(0), y(1), |\mathbf{x})$  as the conditional probability density of the potential outcomes  $(Y(0), Y(1))$  given  $\mathbf{x}$ ,  $e(\mathbf{x}) := p(T = 1|\mathbf{x})$ , and  $f(\mathbf{x})$  as the density of  $\mathbf{x}$ . Then the joint density of  $(Y(0), Y(1), T, \mathbf{X})$  is

$$p(y(0), y(1), t, \mathbf{x}) = f(y(0), y(1), |\mathbf{x})e(\mathbf{x}).$$

Let  $f_1(\cdot|\mathbf{x}) := \int f(y(0), \cdot)d_{y(0)}$  and  $f_0(\cdot|\mathbf{x}) := \int f(\cdot, y(1))d_{y(1)}$ , then joint density of  $(Y, T, \mathbf{X})$  is

$$p(y, t, \mathbf{x}) = [f_1(y|\mathbf{x})e(\mathbf{x})]^t [f_0(y|\mathbf{x})(1 - e(\mathbf{x}))]^{1-t} f(\mathbf{x}).$$

Consider a parametric model  $p(y, t, \mathbf{x}|\theta) = [f_1(y|\mathbf{x}, \theta)e(\mathbf{x}, \theta)]^t [f_0(y|\mathbf{x}, \theta)(1 - e(\mathbf{x}, \theta))]^{1-t} f(\mathbf{x}, \theta)$  such that  $p(y, t, \mathbf{x}|\theta_0) = p(y, t, \mathbf{x})$ . The corresponding score  $s(t, y, \mathbf{x}|\theta) = \frac{\partial}{\partial \theta} \log p(y, t, \mathbf{x}|\theta)$  is

$$\begin{aligned} s(t, y, \mathbf{x} | \theta) &\equiv t \cdot \left[ \frac{\partial}{\partial \theta} \log f_1(y|\mathbf{x}, \theta) \right] + (1 - t) \cdot \left[ \frac{\partial}{\partial \theta} \log f_0(y|\mathbf{x}, \theta) \right] \\ &\quad + \frac{t - p(\mathbf{x}, \theta)}{e(\mathbf{x}, \theta)(1 - e(\mathbf{x}, \theta))} \cdot \left[ \frac{\partial}{\partial \theta} e(\mathbf{x}, \theta) \right] + \frac{\partial}{\partial \theta} \log f(\mathbf{x}, \theta). \end{aligned}$$

Then the tangent space of the model  $p(y, t, \mathbf{x}|\theta)$  is

$$\mathcal{P} := \left\{ t \cdot \left[ \frac{\partial}{\partial \theta} \log f_1(y|\mathbf{x}) \right] + (1 - t) \cdot \left[ \frac{\partial}{\partial \theta} \log f_0(y|\mathbf{x}) \right] + a(\mathbf{x})(t - e(\mathbf{x})) + \frac{\partial}{\partial \theta} \log f(\mathbf{x}) \right\},$$

where  $a(\mathbf{x})$  is any square-integrable measurable function of  $\mathbf{x}$ . Now we turn back to the formulation of  $\tau(\mathbf{x})$ ,

$$\tau_\theta(\mathbf{x}) = \int y f_1(y|\mathbf{x}, \theta) dy - \int y f_0(y|\mathbf{x}, \theta) dy.$$

Let  $F_\tau(Y, T, \mathbf{X}) = \frac{T}{e(\mathbf{X})}(Y - \mu_1(\mathbf{X})) - \frac{1-T}{1-e(\mathbf{X})}(Y - \mu_0(\mathbf{X}))$ , where  $\mu_t(\mathbf{X}) := \mathbb{E}[Y(t)|\mathbf{X}]$ . Then we may validate that

$$\frac{\partial}{\partial \theta} \tau(\theta_0) = \mathbb{E}[F_\tau(Y, T, \mathbf{X}) s(T, Y, \mathbf{X} | \theta_0)].$$

Then based on the result in Bickel et. al. (1993), the variance bound of  $\tau(\mathbf{x})$  is the expected squares of the projection  $F_\tau(Y, T, \mathbf{X})$  in the tangent space  $\mathcal{P}$ , which is equal to  $\mathbb{E}[\frac{\sigma_1^2(\mathbf{X})}{e(\mathbf{X})} + \frac{\sigma_0^2(\mathbf{X})}{1-e(\mathbf{X})}]$ .  $\square$

### Extension of Theorem 3.1

- when  $T$  multi-class categorical:  $\mathbb{V} = \sum_{t \in \mathcal{T}} \mathbb{E} \left[ \frac{\sigma_t^2(\mathbf{X})}{e_t(\mathbf{X})} \right]$ , where  $\sigma_t^2(\mathbf{X}) = \text{Var}[Y(t)|\mathbf{X}]$  and  $e_t(\mathbf{X}) = \mathbb{P}(T = t|\mathbf{X})$ .
- when  $T$  continuous:  $\mathbb{V} = \int_{t \in \mathcal{T}} \mathbb{E} \left[ \frac{\sigma_t^2(\mathbf{X})}{e_t(\mathbf{X})} \right] dt$ , where  $\sigma_t^2(\mathbf{X}) = \text{Var}[Y(t)|\mathbf{X}]$  and  $e_t(\mathbf{X})$  is the conditional density of  $T$  given  $\mathbf{X}$ .

### Supplementary for Proposition 3.1

**Definition. 3.1** Define Instrumental variables ( $I$ ), Confounders ( $C$ ), Adjustment variables ( $A$ ) as

$I = \{X_i | \text{there exists an unblocked path from } X_i \text{ to } T \text{ and } X_i \notin PA(Y) \text{ and } X_i \text{ is not a collider}\};$   
 $C = \{X_i | \text{there exists an unblocked path from } X_i \text{ to } T \text{ and } X_i \in PA(Y)\};$   
 $A = \{X_i | \text{there exists an unblocked path from } X_i \text{ to } Y, \text{ and no unblocked paths from } X_i \text{ to } T\},$   
 where  $PA(Y)$  denotes the set of parent nodes of  $Y$ .

**Proposition. 3.1** Let  $I, C, A$  be the variables set in Definition 3.1. Then (i)  $C$  blocks all the back-door paths from  $T$  to  $Y$ ; (ii)  $P(Y|\mathbf{X}, do(t)) = P(Y|\mathbf{C}, \mathbf{A}, do(t))$

*Proof.* (i) All the back-door paths from  $T$  to  $Y$  are in the form  $T \leftarrow \cdots Y$ . Then we have two sub-cases according to the nearest edge to  $Y$ ,

- 1) If the path is in the form  $T \leftarrow \cdots \leftarrow Y$ : since  $T$  is earlier than  $Y$ , there exist no directed paths from  $Y$  to  $T$ , so there exists at least one collider on this path. Let  $X_i$  denote the one nearest to  $Y$ , then the path is in the form  $T \leftarrow \cdots \rightarrow X_i \leftarrow \cdots \leftarrow Y$ . Therefore, this path is blocked by empty set.
- 2) If the path is in the form  $T \leftarrow \cdots \rightarrow Y$ , let  $X_i$  be the one nearest to  $Y$  in the form  $T \leftarrow \cdots X_i \rightarrow Y$ . If the first segment  $T \leftarrow \cdots X_i$  is an unblocked path, then  $X_i \in C$  and hence the path is blocked by  $C$ . Otherwise, if the first segment  $T \leftarrow \cdots X_i$  is a blocked path (blocked by empty set), then the whole path  $T \leftarrow \cdots X_i \rightarrow Y$  is also blocked by empty set.

In summary, any back-door path from  $T$  to  $Y$  is either blocked by  $C$  or empty set. Thus  $C$  blocks all the back-door from  $T$  to  $Y$ . (ii) Let  $G_{\overline{T}}$  be the causal graph by removing all the edges into  $T$ , then it suffices to show that all the paths from  $X \in \mathbf{X}$  and  $Y$  are blocked by  $C \cup A$ . Suppose  $\pi$  is an unblocked path between  $X$  and  $Y$ . First, note that  $\pi$  would not be a directed path from  $Y$  to  $X$  since  $X$  is a pre-treatment variable. Second,  $PA(Y)$  is on the path  $\pi$ , otherwise  $\pi$  is a blocked path with collider(s). Finally, note that  $PA(Y)$  is either in  $C$  (if  $PA(Y)$  has unblocked path to  $T$ ) or  $A$  (if  $PA(Y)$  has no unblocked paths to  $T$ ), we may conclude that the path is blocked by  $C \cup A$ .  $\square$

### Supplementary for Theorem 3.2

**Theorem. 3.2** The  $\{I, C, A\}$  are identifiable from the joint distribution  $\mathbb{P}(\mathbf{X}, T, Y)$  as follows

- $X_i \in A \Leftrightarrow \{X_i | X_i \perp T \text{ and } X_i \not\perp Y\}$
- $X_i \in I \Leftrightarrow \{X_i | X_i \notin A, X_i \not\perp T, \text{ and there exists a subset } \mathbf{X}' \subset \mathbf{X} \text{ s.t. } X_i \perp Y | \mathbf{X}' \cup \{T\}\}$
- $X_i \in C \Leftrightarrow \{X_i | X_i \notin A \text{ and } X_i \notin I \text{ and } X_i \not\perp T \text{ and } X_i \not\perp Y\}$

Further, the confounders  $C$  may serve as the variables set  $\mathbf{X}'$ , i.e.,  $X_i \perp Y | C \cup \{T\}$  for  $X_i \in I$ .

*Proof.* 1) As for  $X_i \in \mathbf{A}$ , according to Definition 3.1 and the d-separation criterion,  $X_i \perp T$  and  $X_i \not\perp Y$ . Now we show  $\mathbf{A}$  is not empty, i.e.,  $X_i$  that has an unblocked path to  $Y$  may have no unblocked paths to  $T$ . The path between  $X_i$  and  $Y$  is in the form  $X_i \cdots \rightarrow Y$  or  $X_i \cdots \leftarrow Y$ . Note that  $X_i$  is a pre-treatment variable, the latter one has at least one collider otherwise there exists a directed path from  $Y$  to  $X_i$ . So we may only consider the form  $X_i \cdots \rightarrow Y$ , note that there is a directed path  $T \rightarrow Y$ , the path  $T \rightarrow Y \leftarrow \cdots X_i$  is an unblocked path as  $Y$  is a collider.

2) Let  $\pi$  denote the path between  $X_i \in \mathbf{I}$  and  $Y$ .

(a) If  $T$  is on path  $\pi$ , we have two sub-cases depending on whether  $T$  is a collider. (a.1) If  $T$  is a collider such that  $\pi = I \cdots \rightarrow T \leftarrow \cdots Y$ , then the second segment  $T \leftarrow \cdots Y$  is either  $T \leftarrow \cdots \rightarrow Y$  or  $T \leftarrow \cdots \leftarrow Y$ . For the former one, let  $X' \in \text{PA}(Y)$  be the covariate closet to  $Y$ . Note that  $X_i$  is not a collider and has an unblocked path to  $T$ , thus  $X'$  also has an unblocked path to  $T$ , and hence  $X' \in \mathbf{C}$  and the path is blocked by  $\mathbf{C}$ . For the latter one,  $T \leftarrow \cdots \leftarrow Y$  must be a blocked path (because  $T$  is prior to  $Y$ , there would be a collider in this case). (a.2) If  $T$  is not a collider such that  $\pi = I \cdots \rightarrow T \rightarrow \cdots Y$ , then the path is blocked by  $T$ . To summarize, for a path  $\pi$  with  $T$ , the path is blocked by  $T \cup \mathbf{C}$ .

(b) If  $\pi$  does not pass  $T$  and is an unblocked path without collider(s), then  $\pi$  must be in the form  $X_i \cdots \rightarrow Y$  since  $X_i$  is prior to  $Y$ . Denote  $X_j$  as the parent node of  $Y$  on this path, note  $X_j$  has an unblocked path to  $X_i$  and  $X_i$  has an unblocked path to  $T$ , we conclude that  $X_j \in \text{PA}(Y)$  has an unblocked path to  $T$ . Thus we have  $X_j \in \mathbf{C}$ , and  $\pi$  is blocked by  $\mathbf{C}$ .

Overall, based on (a) and (b), any path  $\pi$  between  $X_i \in \mathbf{I}$  and  $Y$  is blocked by  $\mathbf{C} \cup T$ .

3) The equivalent condition for  $\mathbf{C}$  is readily from the definition. Since  $X_i \in \mathbf{C}$  has unblocked paths to both  $T$  and  $Y$ , we have  $X_i \not\perp T$  and  $X_i \not\perp Y$ .

□

## Supplementary for Proposition 3.2

**Proposition.** Denote  $l(\cdot, \cdot)$  as the cross-entropy loss (for categorical) or  $l_2$  loss (for numerical). Let  $\hat{h}_{A \rightarrow T}(\cdot) := \arg \min_h l(h(A(X)), T)$  for given  $A(\cdot)$ ,  $\hat{h}_{C \cup T \rightarrow Y}(\cdot) := \arg \min_h \mathcal{L}(h(C(X) \cup T), Y)$ ,  $\hat{h}_{I \cup C \cup T \rightarrow Y}(\cdot) := \arg \min_h l(h(C(X) \cup I(X) \cup T), Y)$  for given  $C(\cdot)$  and  $I(\cdot)$ . Then

- (i) let  $L_A := l(\hat{h}_{A \rightarrow T}(A(x)), T)$ , then  $L_A$  is maximized when  $A(X) \perp T$ ;
- (ii) let  $L_{I,C} := l_d(\hat{h}_{C \cup T \rightarrow Y}(C(X) \cup T), \hat{h}_{I \cup C \cup T \rightarrow Y}(I(X) \cup C(X) \cup T))$ , where  $l_d(\cdot)$  denote the KL divergence (categorical  $Y$ ) or  $l_2$  loss (numerical  $Y$ ), then  $L_{I,C}$  is minimized when  $I(X) \perp Y | \{T, C(X)\}$ .

*Proof.* Firstly, suppose that  $T$  is binary and  $l(\cdot, \cdot)$  denotes the cross-entropy loss, let

$$\begin{aligned} \mathcal{L}_A^h &= - \sum_i \{T_i \log h_i + (1 - T_i) \log(1 - h_i)\} \\ &= \sum_{A(x) \sim p(A(x)|T=1)} \log h_i + \sum_{A(x) \sim p(A(x)|T=0)} \log(1 - h_i) \end{aligned}$$

For each  $X = x$ , by setting the derivative  $\frac{\partial}{\partial h_i} \mathcal{L}_A^h = 0$ , we have

$$\hat{h}_{A \rightarrow T}(A(x)) = \frac{p(A(x)|t=1)}{p(A(x)|t=1) + p(A(x)|t=0)}.$$

Substituting  $\hat{h}_{A \rightarrow T}(A(x))$  into  $L_A$ , we have

$$\begin{aligned} L_A &= - \left\{ \sum_{A(x) \sim p(A(x)|T=1)} \log \frac{p(A(x)|T=1)}{p(A(x)|T=1) + p(A(x)|T=0)} + \right. \\ &\quad \left. \sum_{A(x) \sim p(A(x)|T=0)} \log \frac{p(A(x)|T=0)}{p(A(x)|T=1) + p(A(x)|T=0)} \right\} \\ &= \log 4 - D_{KL}(p(A(x)|T=1) || \frac{p(A(x)|T=1) + p(A(x)|T=0)}{2}) \\ &\quad - D_{KL}(p(A(x)|T=0) || \frac{p(A(x)|T=1) + p(A(x)|T=0)}{2}) \\ &\leq \log 4. \end{aligned}$$

Meanwhile, note that  $L_A = \log 4$  when  $p(A(x)|T = 1) = p(A(x)|T = 0)$ . We may conclude that  $L_A$  is maximized when  $A(x) \perp T$ .

Secondly, when  $T$  is numeric,  $l(\cdot, \cdot)$  denotes the  $l_2$  loss, and

$$\hat{h}_{A \rightarrow T}(A(x)) = \mathbb{E}[T|A(x)].$$

Substituting  $\hat{h}_{A \rightarrow T}(A(x))$  into  $L_A$ , we have

$$L_A = \mathbb{E}[T - \mathbb{E}[T|A(x)]]^2 = \text{Var}[\mathbb{E}(T|A(X))]$$

Note that

$$\text{Var}(T) = \text{Var}[\mathbb{E}(T|A(X))] + \mathbb{E}[\text{Var}(T|A(X))],$$

we have  $L_A \leq \text{Var}(T)$ .

Meanwhile, note that when  $T \perp A(X)$ , we have  $\mathbb{E}(T|A(X)) = \mathbb{E}(T)$ , and hence

$$L_A = \mathbb{E}[T - \mathbb{E}[T]]^2 = \text{Var}(T).$$

Thus,  $L_A$  is maximized when  $T \perp A(X)$ .

The proof for (ii) follows the similar way. Firstly, when  $Y$  is binary, we have

$$\begin{aligned} \hat{h}_{C \cup T \rightarrow Y}(C(x), t) &= \frac{p(C(x), t|Y = 1)}{p(C(x), t|Y = 1) + p(C(x), t|Y = 0)} \\ \hat{h}_{I \cup C \cup T \rightarrow Y}(I(x), C(x), t) &= \frac{p(I(x), C(x), t|Y = 1)}{p(I(x), C(x), t|Y = 1) + p(I(x), C(x), t|Y = 0)}. \end{aligned}$$

Note that the KL divergence  $D_{KL}(\hat{h}_{C \cup T \rightarrow Y}(C(x), t) || \hat{h}_{I \cup C \cup T \rightarrow Y}(I(x), C(x), t)) \geq 0$ , and  $\hat{h}_{C \cup T \rightarrow Y}(C(x), t) \equiv \hat{h}_{I \cup C \cup T \rightarrow Y}(I(x), C(x), t)$  when  $p(Y|I(X), C(X), T) = p(Y|C(X), T)$ , we have  $L_{I,C}$  is minimized when  $p(Y|I(X), C(X), T) = p(Y|C(X), T)$ , i.e.,  $Y \perp I(X)|C(X), T$

When  $Y$  is numerical, we have

$$\begin{aligned} \hat{h}_{C \cup T \rightarrow Y}(C(x), t) &= \mathbb{E}[Y|C(x), t]. \\ \hat{h}_{I \cup C \cup T \rightarrow Y}(I(x), C(x), t) &= \mathbb{E}[Y|I(x), C(x), t]. \end{aligned}$$

Therefore, we have  $\hat{h}_{C \cup T \rightarrow Y}(C(x), t) = \hat{h}_{I \cup C \cup T \rightarrow Y}(I(x), C(x), t)$  when  $Y \perp I(X)|C(X), T$ , and  $L_{I,C} = 0$  in this case. To summarize,  $L_{I,C}$  is minimized when  $Y \perp I(X)|C(X), T$ .  $\square$

## Supplementary for source code

- `module_DER_extended.py` includes the model for both ADR and DeR-CFR;
- `module_DR.py` includes the model for DR-CFR;
- `train.py` is the script for one-time run by inputting the hyper-parameters in the command line.
- `run.py` is the script for multiple runs by setting a list of parameters in `.json` file. The hyper-parameters setting in our paper can be found in `./configs/params_all.json`.

## selection of hyper parameters

The hyper-parameters mainly involve the  $\{\alpha, \beta, \mu, \lambda\}$  and  $K$  (Sec 4.3).

- $\alpha = \beta = 1$  by default when are all cross-entropy loss since the gradients are of the same scale. In the continuous case, we may need to adjust  $\alpha$  and  $\beta$  because  $T$  and  $Y$  may not have a similar scale; The default parameter  $\mu$  for the orthogonal loss is 10 and we need to adjust by observing the scale of  $\mathcal{L}_O$ ;
- The default parameter of  $\lambda$  is  $10^{-3}$  as the regularization term is commonly much larger;
- As for  $K$ , the number of iterations to train the auxiliary predictors  $h_*$ 's, we commonly take  $K = 1, 2, 3$ .

In practice, we suggest to use tensorboard or similar tools to record the details of the loss functions (including each component) and adjust the hyper-parameters to make the parameters convergent and loss become steady.

## learning curve

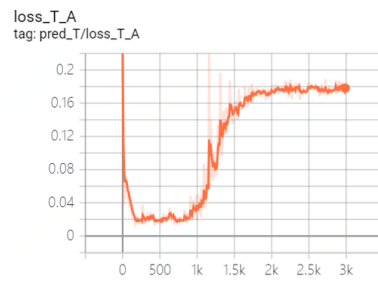

(a) the curve of  $\mathcal{L}_A^h$

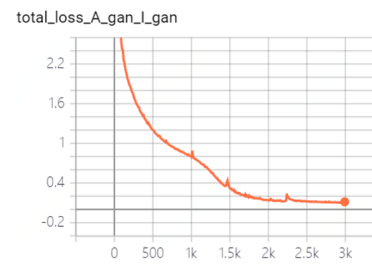

(b) the curve of  $\mathcal{L}$

## References

- [1] Judea Pearl. *Causality*. Cambridge University Press, 2009.
